# Supplementary material for: Tumor-Associated Macrophages Derived TGF-β‒Induced Epithelial to Mesenchymal Transition in Colorectal Cancer Cells through Smad2,3-4/Snail Signaling Pathway
Source: PubMed Central journal article supplement — Cancer Res Treat. 2018 Apr 25;51(1):252–66. doi: 10.4143/crt.2017.613 (PMC6333993; doi:10.4143/crt.2017.613), 2018-04-25
Supplement: crt-2017-613-suppl1.pdf [file crt-2017-613-suppl1.pdf]

## Supplementary Material

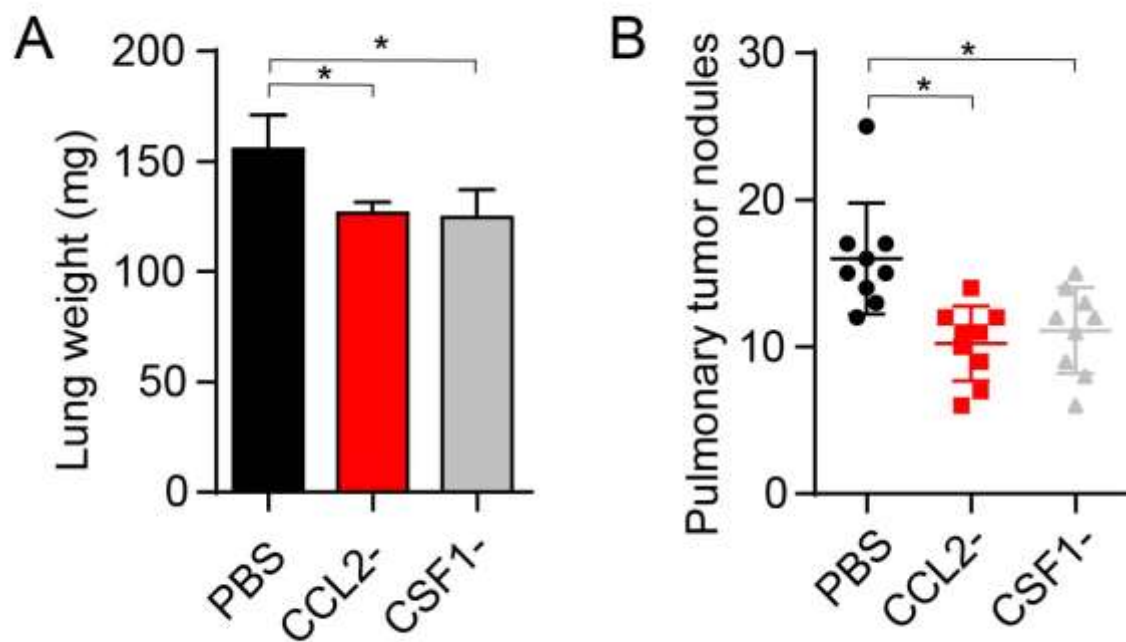

**S1 Fig.** Inhibition of tumor-associated macrophages (TAMs) by anti-CCL2 or anti-CSF1R antibody suppresses the metastasis of colorectal cancer cells. (A) The lung weight of tumor-bearing mice treated with phosphate buffered saline (PBS) or anti-CCL2 or anti-CSF1R (n=10). (B) The number of pulmonary tumor nodules in tumor-bearing mice treated with PBS or anti-CCL2 or anti-CSF1R (n=10). The data was presented as the mean±standard error of mean from three independent experiments. \*p < 0.05.
