# Supplementary material for: Tumor-Associated Macrophages Derived TGF-β‒Induced Epithelial to Mesenchymal Transition in Colorectal Cancer Cells through Smad2,3-4/Snail Signaling Pathway
Source: PubMed Central journal article supplement — Cancer Res Treat. 2018 Apr 25;51(1):252–66. doi: 10.4143/crt.2017.613 (PMC6333993; doi:10.4143/crt.2017.613), 2018-04-25
Supplement: crt-2017-613-suppl2.pdf [file crt-2017-613-suppl2.pdf]

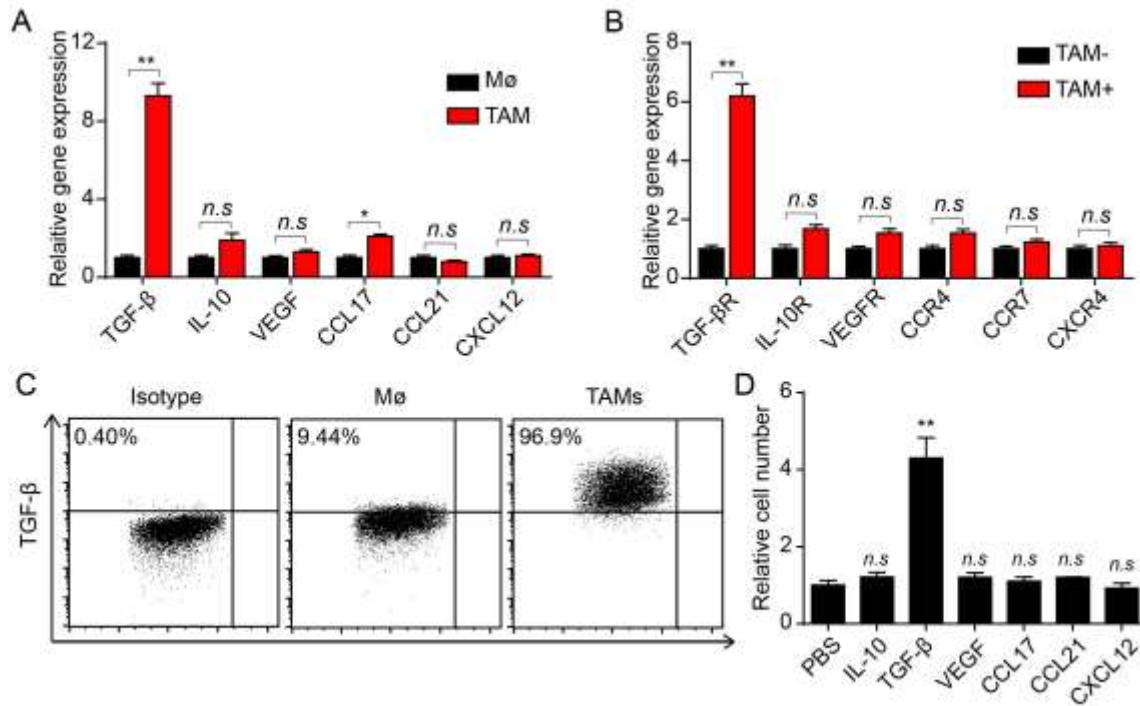

**S2 Fig.** Tumor-associated macrophages (TAMs) promote colorectal cancer cells metastasis via secretion of transforming growth factor- $\beta$  (TGF- $\beta$ ). (A) The relative expression of TGF- $\beta$ , interleukin (IL)-10, vascular endothelial growth factor (VEGF), CCL18, CCL21, and CXCL21 in macrophages from para-carcinoma tissues or TAMs from tumor tissues of patients (n=3). (B) The relative expression of TGF- $\beta$ R, IL-10R, vascular endothelial growth factor receptor (VEGFR), PITPNM3, CCR7, and CXCR4 in HCT116 treated with TAMs or not (n=3). (C) The macrophages from para-carcinoma tissues or TAMs from tumor tissues were isolated to analyze the expression of TGF- $\beta$  by flow cytometry. (D) Relative migrant cell number in  $10^4$  HCT116 cells (n=3) treated with PBS, IL-10, TGF- $\beta$ , VEGF, CCL18, CCL21, and CXCL12 for 24 hours. The data was presented as the mean $\pm$ standard error of mean from three independent experiments. \*\*p < 0.01.
